# Supplementary material for: An AIE Metal Iridium Complex: Photophysical Properties and Singlet Oxygen Generation Capacity
Source: MDPI journal article supplement (doi:10.3390/molecules28237914), 2023-12-03
Supplement: s1 [file s1]

## Supporting information

# An AIE Metal Iridium Complex: Photophysical Properties and Singlet Oxygen Generation Capacity

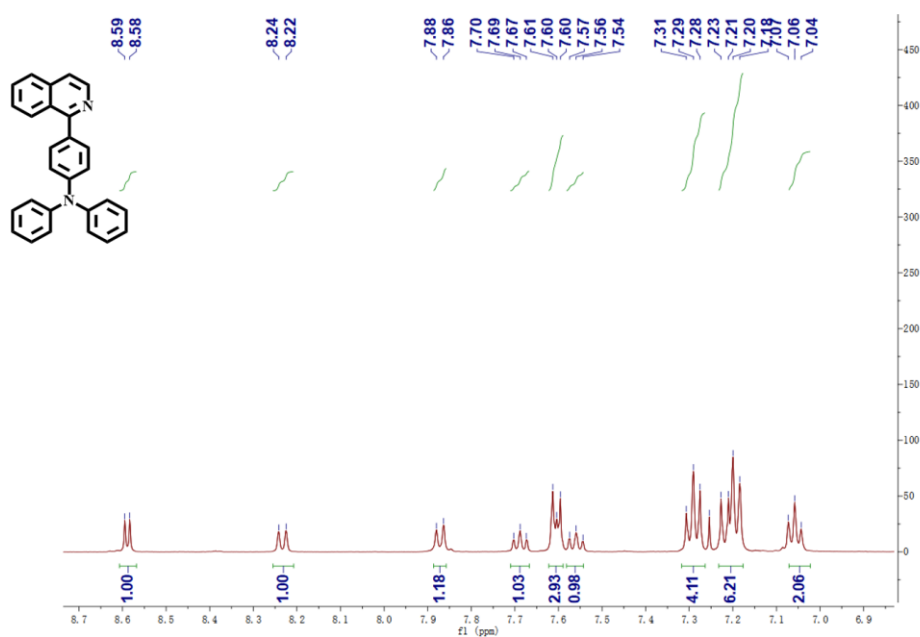

**Figure S1.**  $^1\text{H}$  NMR nuclear magnetic spectrum of TPA in  $\text{CDCl}_3$

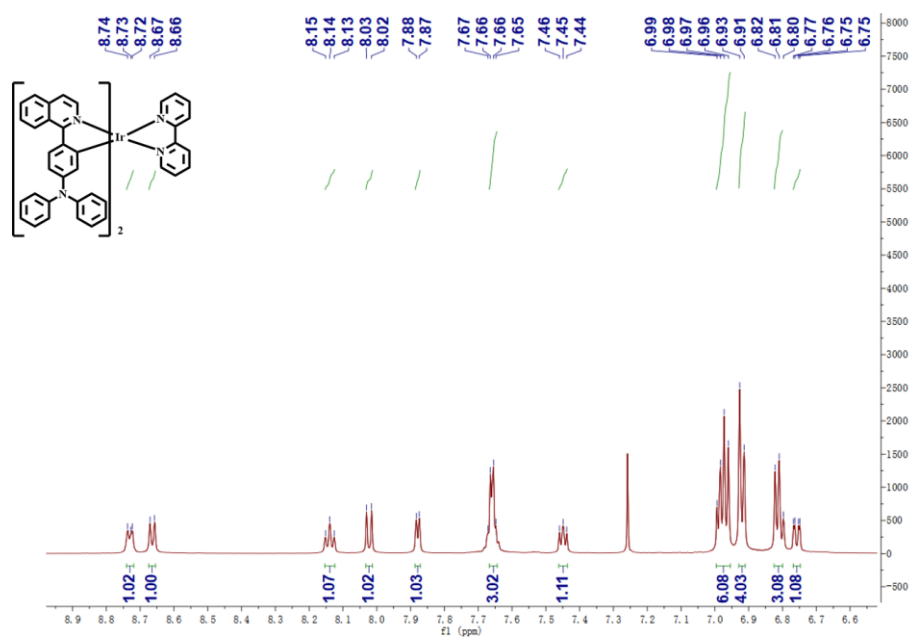

**Figure S2.**  $^1\text{H}$  NMR nuclear magnetic spectrum of **Ir-TPA** in  $\text{CDCl}_3$

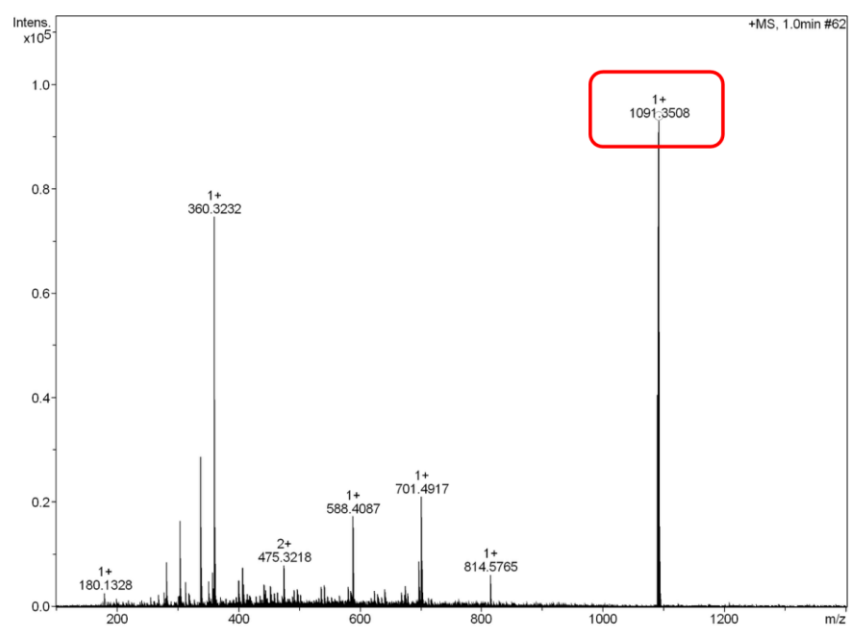

**Figure S3.** Mass spectrum of the complex **Ir-TPA**

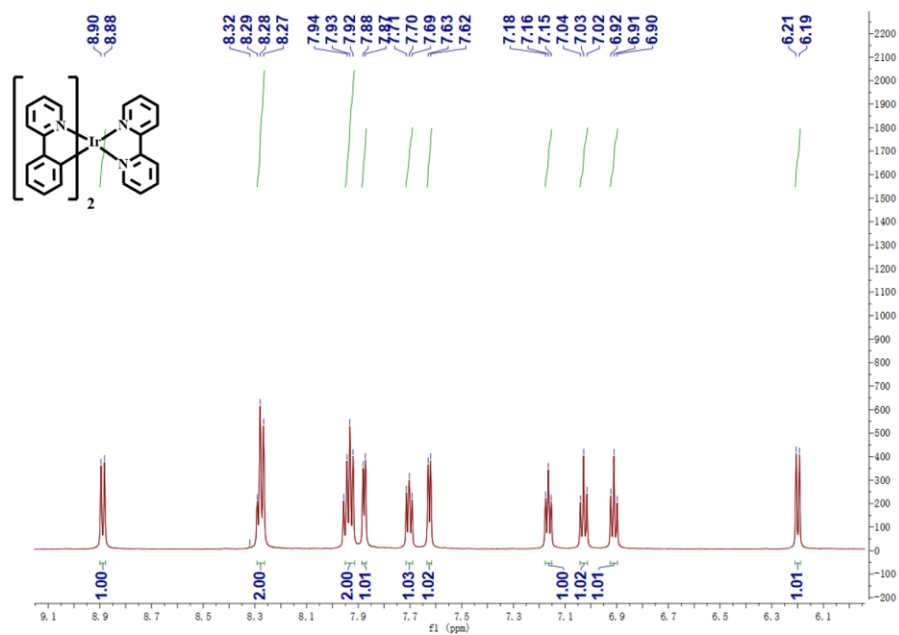

**Figure S4.** <sup>1</sup>H NMR nuclear magnetic spectrum of **Ir-py** in DMSO

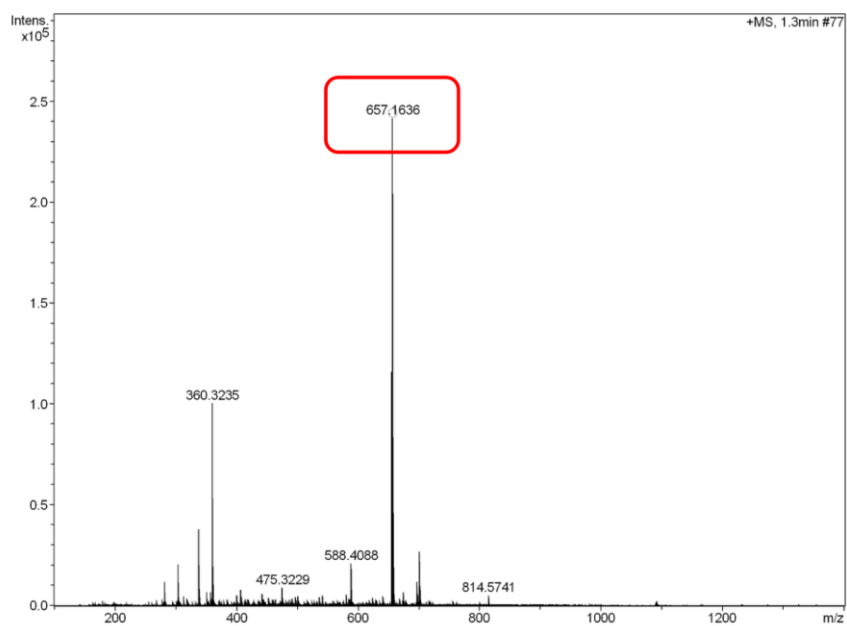

**Figure S5.** Mass spectrum of the complex **Ir-py**
